# Supplementary material
Source: bioRxiv or medRxiv preprint supplement (https://www.biorxiv.org/highwire/filestream/101088/field_highwire_adjunct_files/12/324509-5.pdf)
Supplement: Supplementary file [file 324509-5.pdf]

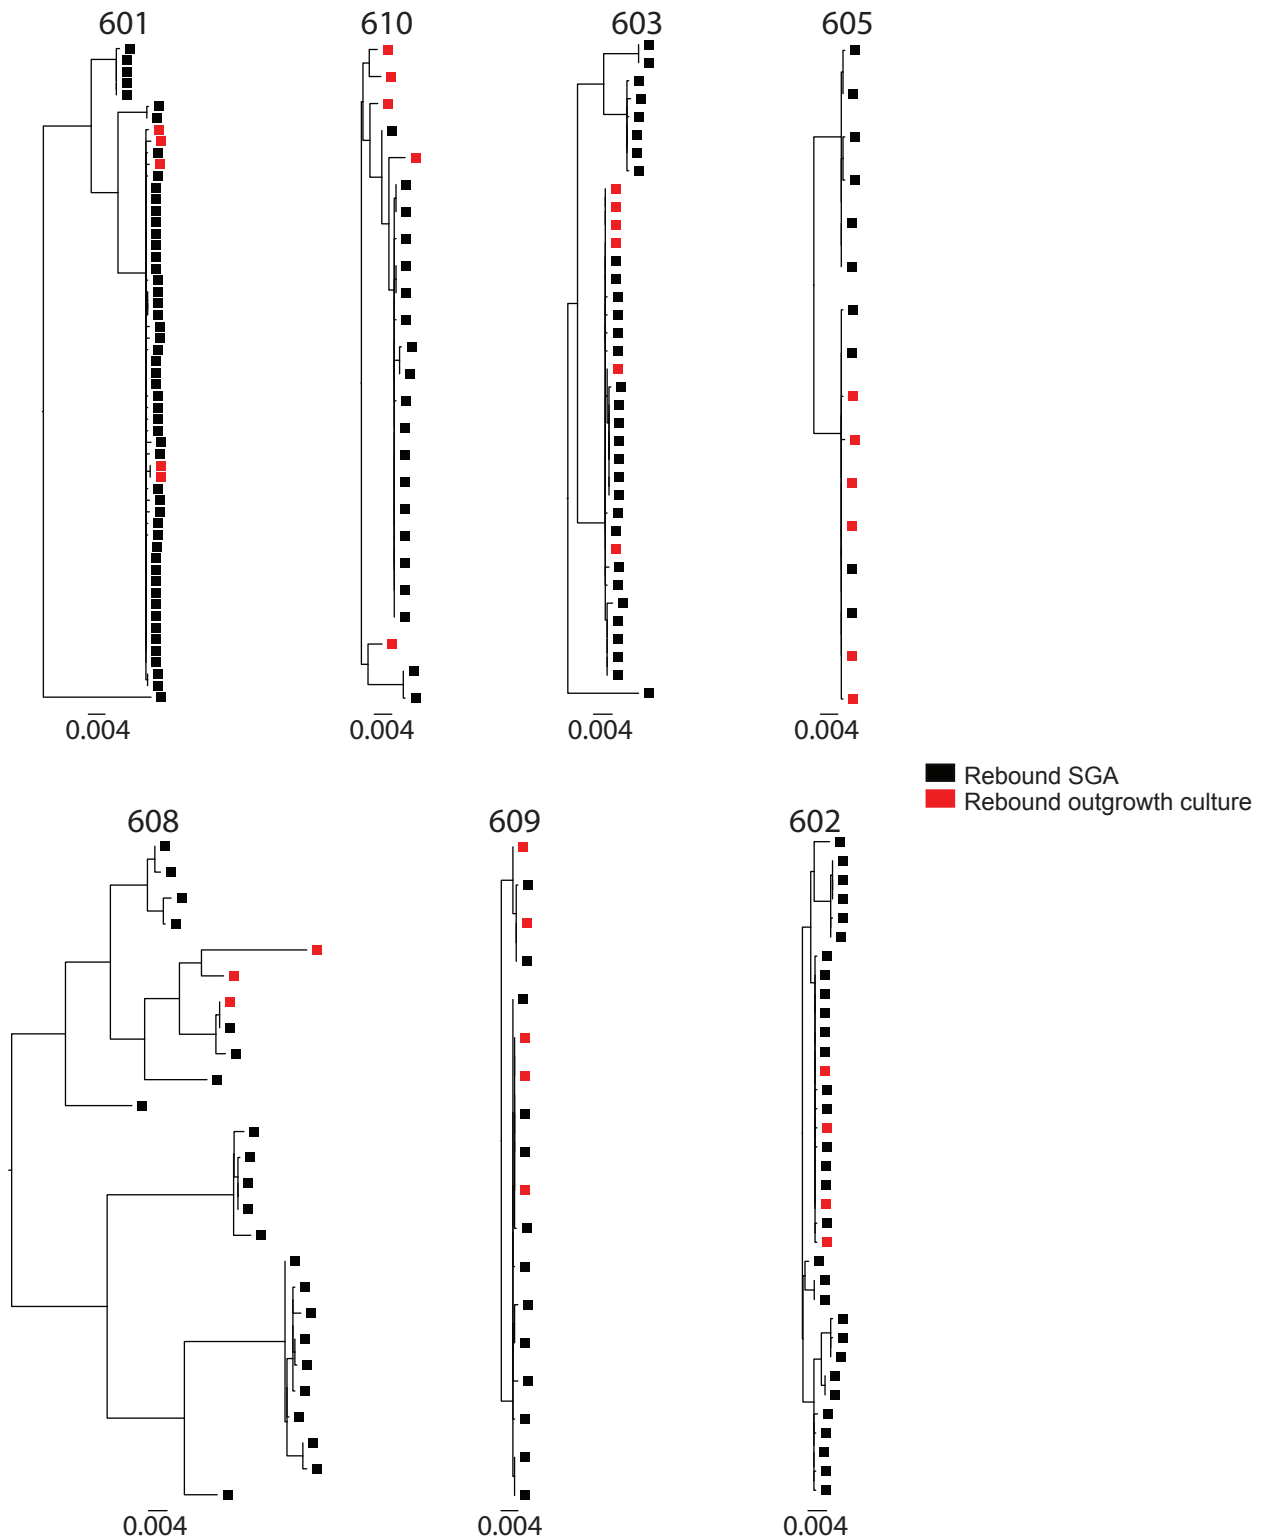

**Supplementary Figure 5. Env sequences from rebound outgrowth cultures and rebound SGA.**  
 Maximum likelihood phylogenetic trees of full-length env sequences of viruses from rebound outgrowth cultures and rebound SGA from 7 participants. Viruses from outgrowth culture are represented in red rectangles and from rebound SGA in black rectangles.
